# Supplementary material for: Use of peripheral vascular access in the prehospital setting: is there room for improvement?
Source: BMC Emerg Med. 2020 Jun 9;20:46. doi: 10.1186/s12873-020-00340-z (PMC7285568; doi:10.1186/s12873-020-00340-z)
Supplement: Supplementary file 1 — Prehospital diagnosis of patients with an unused peripheral vascular access and a NACA score < 4. [file 12873_2020_340_MOESM1_ESM.xlsx]

## Sheet: additional file 1
Supplementary file 1: Prehospital diagnosis of patients with an unused peripheral vascular access and a NACA score < 4
Number of cases	2626 (100)
Decreased general condition	301 (11,5)
Non-cardiac syncope	274 (10,4)
Non-traumatic chest pain without loss of consciousness	268 (10,2)
Respiratory failure or distress	213 (8,1)
Seizure	192 (7,3)
Intoxication without trauma (alcool, drugs, smoke)	153 (5,8)
Limb trauma	121 (4,6)
Neurological deficit without coma nor trauma	107 (4,1)
Abdominal pain without trauma	99 (3,8)
Craniocerebral trauma	93 (3,5)
Altered consciousness without trauma	67 (2,6)
Haemorrage without trauma (digestive, ENT, gynaecological)	66 (2,5)
Rhythmic and/or conduction disorder	60 (2,3)
Spinal trauma	38 (1,4)
Impossible care at home	32 (1,2)
Pregnancy, delivery, birth	30 (1,1)
Thrust or hypertensive urgency	30 (1,1)
Psychiatric disorder (agitation, anxiety, etc.)	26 (1,0)
Allergy without shock	24 (0,9)
Headache	24 (0,9)
Chest trauma	16 (0,6)
Low back pain without trauma	15 (0,6)
Facial trauma	14 (0,5)
Shock (haemodynamic, cardiogenic, septic, anaphylactic, etc.)	12 (0,5)
Abdominal trauma	9 (0,3)
Polytrauma	8 (0,3)
Burns	7 (0,3)
Coma without trauma	6 (0,2)
Pelvic/perineal trauma	5 (0,2)
Asthma	3 (0,1)
Electrification without cardiac arrest	2 (0,1)
Hypothermia without cardiac arrest	2 (0,1)
Cardiac arrest	1 (0,0)
Other	308 (11,7)
