# Supplementary material for: Use of peripheral vascular access in the prehospital setting: is there room for improvement?
Source: BMC Emerg Med. 2020 Jun 9;20:46. doi: 10.1186/s12873-020-00340-z (PMC7285568; doi:10.1186/s12873-020-00340-z)
Supplement: Supplementary file 2 — Prehospital diagnosis of patients with unused peripheral vascular access and NACA score ≥ 4. [file 12873_2020_340_MOESM2_ESM.xlsx]

## Sheet: additional file 2
Supplementary file 2: Prehospital diagnosis of patients with unused peripheral vascular access and NACA score ≥4
Numbers of Cases	1322 (100)
Respiratory failure or distress	287 (21,7)
Neurological deficit without coma nor trauma	273 (20,7)
Non-traumatic chest pain without loss of consciousness	110 (8,3)
Craniocerebral trauma	60 (4,5)
Rhythmic and/or conduction disorder (bradycardia, atrioventricular block, …)	55 (4,2)
Non-traumatic coma	55 (4,2)
Altered consciousness without trauma	52 (3,9)
Intoxication without coma (alcool, drugs, smoke)	47 (3,6)
Shock (haemodynamic, cardiogenic, septic, anaphylactic, etc.)	41 (3,1)
Seizure	36 (2,7)
Haemorrage without trauma (digestive, ENT, gynaecological)	35 (2,7)
Decreased general condition	34 (2,6)
Cardiac arrest	28 (2,1)
Non-cardiac syncope	26 (2,0)
Abdominal pain without trauma	17 (1,3)
Limb trauma	16 (1,2)
Polytrauma	13 (1,0)
Spinal trauma	8 (0,6)
Asthma	8 (0,6)
Allergy without shock	7 (0,5)
Impossible care at home	5 (0,4)
Thrust or hypertensive urgency	5 (0,4)
Chest trauma	5 (0,4)
Pregnancy, delivery, birth	4 (0,3)
Facial trauma	4 (0,3)
Headache	3 (0,2)
Hypothermia without cardiac arrest	3 (0,2)
Electrification without cardiac arrest	2 (0,2)
Abdominal trauma	1 (0,1)
Burns	1 (0,1)
Other	81 (6,1)
