# Supplementary material for: Use of peripheral vascular access in the prehospital setting: is there room for improvement?
Source: BMC Emerg Med. 2020 Jun 9;20:46. doi: 10.1186/s12873-020-00340-z (PMC7285568; doi:10.1186/s12873-020-00340-z)
Supplement: Supplementary file 3 — Medication given (all patients). [file 12873_2020_340_MOESM3_ESM.xlsx]

## Sheet: Table 3
Supplementary file 3: Medication given (all patients)
Numbers of iv medications	6436 (100)
Opiates	3109 (48.3)
Acetylsalicylic acid	551 (8,6)
Vascular Filling	529 (8,2)
Anti-nausea medication	479 (7,4)
Adrenalin	276 (4,3)
Benzodiazepines	265 (4.1)
Glucose	142 (2,2)
Curares	141 (2.2)
Furosemide	137 (2,1)
Etomidate	77 (1,2)
Droperidol	76 (1,2)
Methylprednisolone	72 (1,1)
Ketamine	66 (1,0)
Ephredine	64 (1,0)
Tranexamic acid	63 (1,0)
Amiodarone	58 (0,9)
Phenylephrine	51 (0,8)
Clemastine	49 (0,8)
Paracetamol	47 (0,7)
Proton pump inhibitor	35 (0.5)
Atropine	34 (0,5)
Naloxone	32 (0,5)
Heparin	27 (0,4)
Flumazenil	26 (0,4)
Magnesium	21 (0,3)
Thiamine	15 (0,2)
Beta blockers	15 (0.2)
Adenosine	13 (0,2)
Oxytocin	9 (0,1)
Lidocaine	8 (0,1)
Ceftriaxone	7 (0,1)
Octreotide	5 (0,1)
Propofol	4 (0,1)
Calcium	3 (0,0)
Salbutamol	3 (0,0)
Ketorolac	2 (0,0)
Scopolamine butylbromide	1 (0,0)
