# Supplementary material for: Use of peripheral vascular access in the prehospital setting: is there room for improvement?
Source: BMC Emerg Med. 2020 Jun 9;20:46. doi: 10.1186/s12873-020-00340-z (PMC7285568; doi:10.1186/s12873-020-00340-z)
Supplement: Supplementary file 4 — Medication given to patients with NACA score < 4. [file 12873_2020_340_MOESM4_ESM.xlsx]

## Sheet: Table 4
Supplementary file 4: Medication given to patients with NACA score < 4
Number of cases	3605 (100)
Opiates	2550 (71,7)
Anti-nausea medication	371 (10,3)
Acetylsalicylic acid	233 (6,5)
Vasculary filling	175 (4,9)
Glucose	60 (1,7)
Benzodiazepines	45 (1,2)
Paracetamol	37 (1,0)
Ketamine	28 (0,8)
Furosemide	19 (0,5)
Clemastine	16 (0,4)
Methylprednisolone	15 (0,4)
Proton pump inhibitor	17 (0,5)
Oxytocin	8 (0,2)
Ephedrine	4 (0,1)
Flumazenil	4 (0,1)
Thiamine	4 (0,1)
Tranexamic acid	4 (0,1)
Labetalol	3 (0,1)
Heparin	2 (0,1)
Magnesium	2 (0,1)
Atropin	1 (0,0)
Amiodarone	1 (0,0)
Adenosine	1 (0,0)
Scopolamine butylbromide	1 (0,0)
Esmolol	1 (0,0)
Ketorolac	1 (0,0)
Lidocaine	1 (0,0)
Phenylephrine	1 (0,0)
